# Supplementary material for: An Optimized Protocol for Comprehensive Evaluations of Salt Tolerance in Crop Germplasm Accessions: A Case Study of Tomato (Solanum lycopersicum L.)
Source: MDPI journal article supplement (doi:10.3390/agronomy14040842), 2024-04-17
Supplement: s1 [file s1]

**Supplemental Information – Chen et al. An Optimized Protocol for Comprehensive Evaluations of Salt Tolerance in Crop Germplasm Accessions: A Case Study of Tomato (*Solanum lycopersicum* L.)**

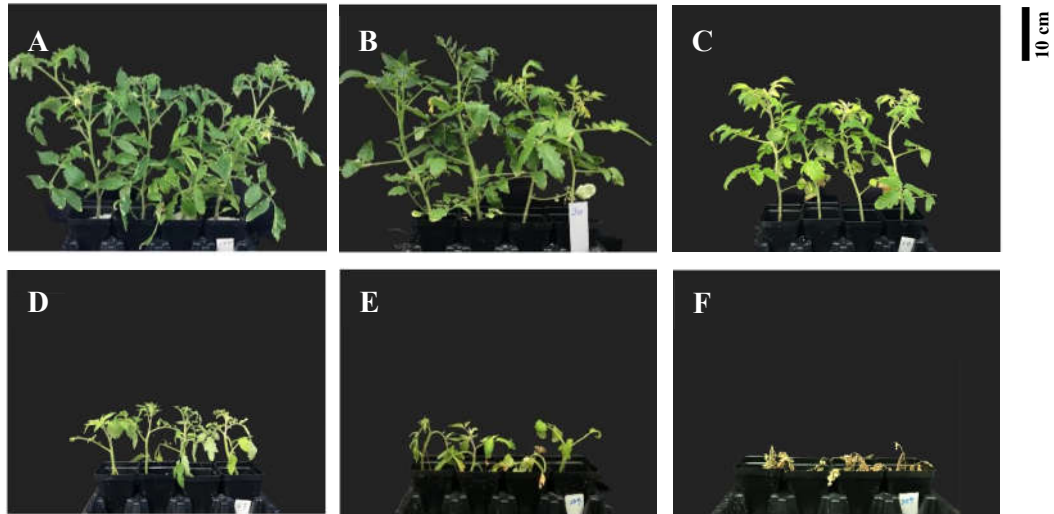

**Figure S1. Phenotypes of tomato germplasm accessions exhibiting different degrees of salt damage.**

Note: A: Normal phenotype (NX132), B: Grade I damage (NX20), C: Grade II damage (NX10), D: Grade III damage (NX47), E: Grade IV damage (NX299), F: Grade V damage (NX259).

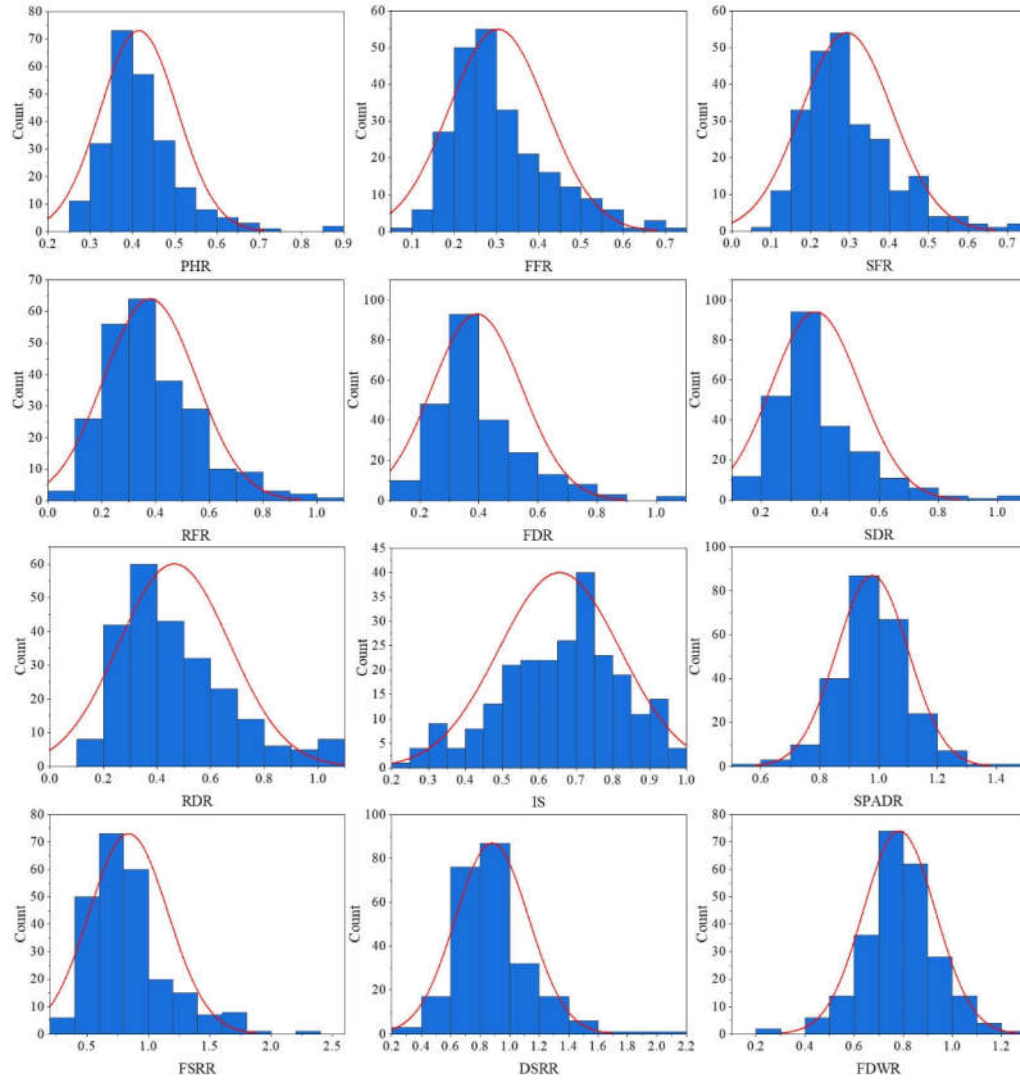

**Figure S2. Distribution of salt tolerance coefficients and index of salinity damage (IS).**

Note: PH: Plant Height, FF: Full Fresh weight of seedling; SF: Shoot Fresh weight, RF: Root Fresh weight, FD: Full Dry weight of seedling, SD: Shoot Dry weight, RD: Root Dry weight, SPAD: relative chlorophyll value, FSR: Fresh weight ratio of Shoot to Root, DSR: Dry weight ratio of Shoot to Root, FDW: ratio of Fresh weight to Dry Weight. PHR, FFR, SFR, RFR, FDR, SDR, RDR, SPADR, FSRR, DSRR and FDWR represent the salt tolerance coefficient for the corresponding traits.

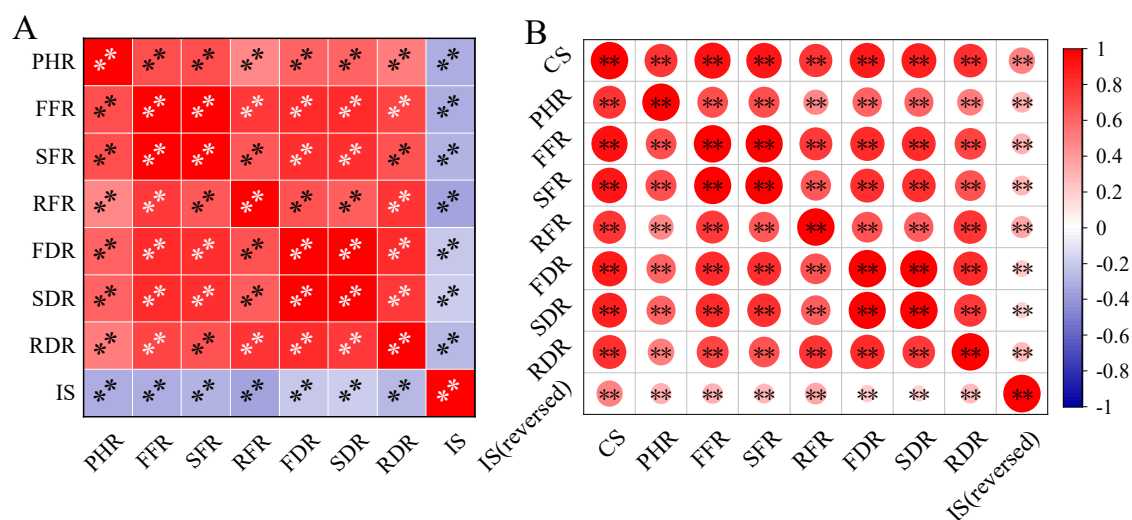

**Figure S3. Correlation analysis of salt tolerance traits in tomato initial germplasm.**

Note: PH: Plant Height, FF: Full Fresh weight of seedling; SF: Shoot Fresh weight, RF: Root Fresh weight, FD: Full Dry weight of seedling, SD: Shoot Dry weight, RD: Root Dry weight, PHR, FFR, SFR, RFR, FDR, SDR and RDR represent the salt tolerance coefficient for the corresponding traits. CS: Comprehensive Score, IS: Index of Salinity damage, IS (reversed): the values of inversion of the IS. \*\*:  $p < 0.01$ .

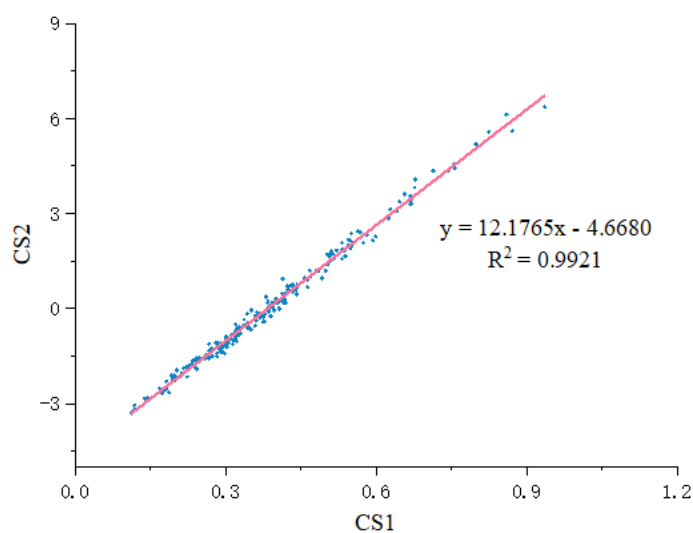

**Figure S4. Correlation analysis of comprehensive scores derived from two different weighting methods.**

Note: CS: Comprehensive Scores. CS1 and CS2 refer to scores calculated using weighting method 1 and 2, respectively.

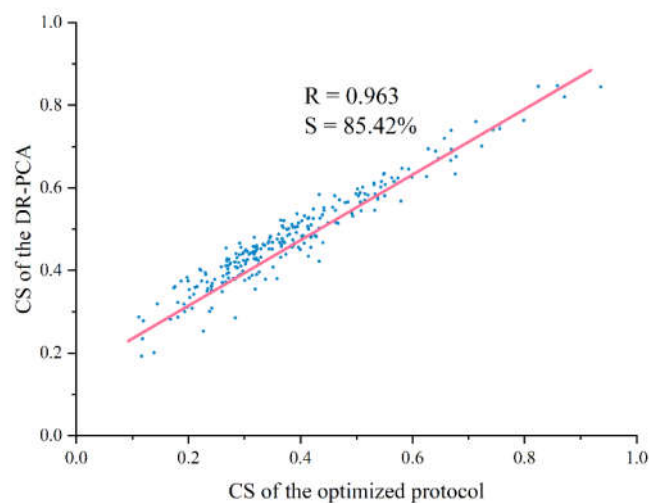

**Figure S5. Concordance analysis of comprehensive evaluation results between the newly proposed approach and the classical DR-PCA approach.**

Note: CS: Comprehensive Scores. R: Correlation coefficient. S: Side sameness. DR-PCA refers to the classical approach—Dimensionality Reduction-Principal Component Analysis.

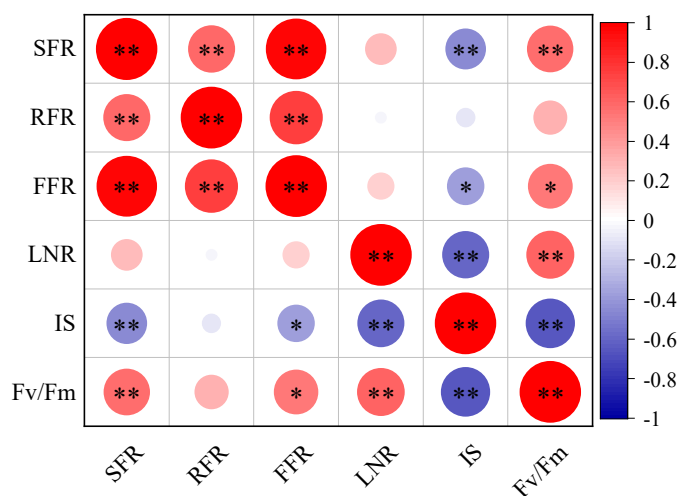

**Figure S6. Correlation analysis of salt tolerance traits in new tomato population.**

Note: SF: Shoot Fresh weight, RF: Root Fresh weight, FF: Full Fresh weight of seedling; LN: Leaf Number. SFR, RFR, FFR and LNR represent the salt tolerance coefficient for the corresponding traits. IS: Index of Salinity damage; Fv/Fm: maximum photochemical efficiency. \*:  $p < 0.05$ , \*\*:  $p < 0.01$ .

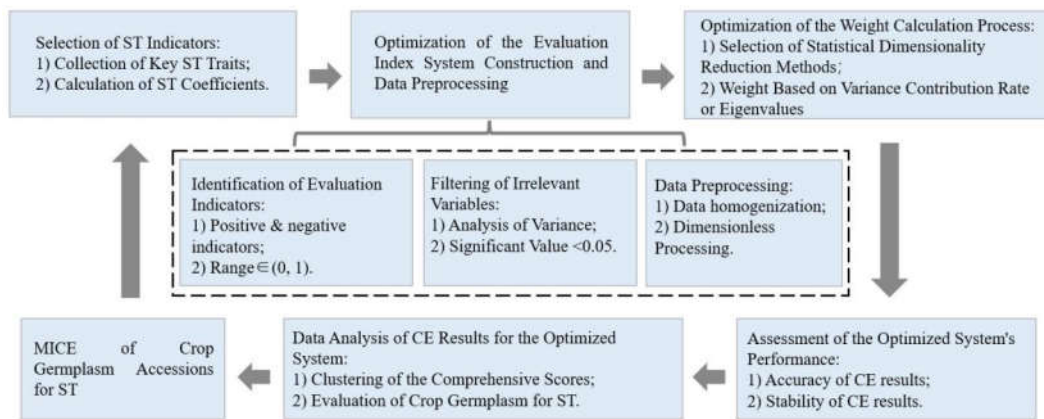

**Figure S7. Framework for the comprehensive evaluation of salt tolerance in crop germplasm utilized in this study.** Note: ST: Salt Tolerance, CE: Comprehensive Evaluation, MICE: Multi-Index Comprehensive Evaluation.
