# Supplementary material for: An Optimized Protocol for Comprehensive Evaluations of Salt Tolerance in Crop Germplasm Accessions: A Case Study of Tomato (Solanum lycopersicum L.)
Source: MDPI journal article supplement (doi:10.3390/agronomy14040842), 2024-04-17
Supplement: s1 [file s1]

Archive with 2 entries (2 files):
- agronomy-2948300-supplementary/Supplementary figures.pdf
- agronomy-2948300-supplementary/Supplementary tables.xlsx
