# Supplementary material for: An Optimized Protocol for Comprehensive Evaluations of Salt Tolerance in Crop Germplasm Accessions: A Case Study of Tomato (Solanum lycopersicum L.)
Source: MDPI journal article supplement (doi:10.3390/agronomy14040842), 2024-04-17
Supplement: s1 [file s1 › agronomy-2948300-supplementary/Supplementary tables.xlsx]

## Sheet: Table S1
Table S1. Background information of 249 tomato genotypes used in this study
Sample	Accession number	Name	Origin	Botanical variety	Growth habit	Categories	Fruit size †
NX1	NT-1	Ace 55 VF	USA	S. lycopersicum ‘cerasiforme’	Indeterminate	Cherry	Small
NX3	NT-3-3-1	Beef Steak	USA	S. lycopersicum	Indeterminate	Heirloom	Medium
NX7	NT-16-3-2	Pole Brandywine	USA	S. lycopersicum ‘cerasiforme’	Determinate	Cherry	Small
NX9	NT-22	Red Cherry	USA	S. lycopersicum ‘cerasiforme’	Determinate	Cherry	Small
NX10	NT-23yellow	Roma	USA	S. lycopersicum ‘cerasiforme’	Determinate	Cherry	Small
NX11	NT-27-7-2	Cherry Supersweet 100	USA	S. lycopersicum ‘cerasiforme’	Semi-determinate	Cherry	Small
NX12	NT-28long	Grape Telly Bean long	USA	S. lycopersicum ‘cerasiforme’	Determinate	Cherry	Small
NX13	NT-28round	Grape Telly Bean round	USA	S. lycopersicum ‘cerasiforme’	Semi-determinate	Cherry	Small
NX14	NT-29	Pole Beafsteak	USA	S. lycopersicum	Determinate	Heirloom	Large
NX15	NT-30	Bush Silvery Fir Tree	USA	S. lycopersicum	Determinate	Heirloom	Medium
NX16	NT-33	Yellow Pear	USA	S. lycopersicum	Indeterminate	Heirloom	Small
NX17	NT-35	Goldene Konigin	USA	S. lycopersicum ‘cerasiforme’	Indeterminate	Cherry	Small
NX18	NT-38	Big Red	Canada	S. lycopersicum	Indeterminate	Fresh market	Large
NX19	NT-41	Mini Red 1	Canada	S. lycopersicum ‘cerasiforme’	Indeterminate	Cherry	Small
NX20	NT-42	Mini Red 2	Canada	S. lycopersicum ‘cerasiforme’	Indeterminate	Cherry	Small
NX21	NT-43	Mini Yellow	Canada	S. lycopersicum ‘cerasiforme’	Indeterminate	Cherry	Small
NX22	NT-48round	Gina	Holland	S. lycopersicum ‘cerasiforme’	Indeterminate	Cherry	Small
NX23	NT-49	Jina	Holland	S. lycopersicum ‘cerasiforme’	Indeterminate	Cherry	Small
NX24	NT-53	Sabata	Holland	S. lycopersicum ‘cerasiforme’	Indeterminate	Cherry	Small
NX25	NT-55long	Modified Cairo	Holland	S. lycopersicum ‘cerasiforme’	Indeterminate	Cherry	Small
NX26	NT-56yellow	Fushi NO.6	Holland	S. lycopersicum ‘cerasiforme’	Indeterminate	Cherry	Small
NX27	NT-59	Portuguese tomato (Puda)	Portugal	S. lycopersicum ‘cerasiforme’	Indeterminate	Cherry	Small
NX28	NT-63big-4-1	HV-130	China	S. lycopersicum ‘cerasiforme’	Determinate	Cherry	Small
NX29	NT-67yellow-8-3	MIX-003	China	S. lycopersicum ‘cerasiforme’	Indeterminate	Cherry	Small
NX30	NT-68yellow	MIX-002	China	S. lycopersicum ‘cerasiforme’	Indeterminate	Cherry	Small
NX32	NT-73-1-1	Zhaoyan-269	China	S. lycopersicum ‘cerasiforme’	Semi-determinate	Cherry	Small
NX33	NT-74	Di Haung Yellow	China	S. lycopersicum ‘cerasiforme’	Semi-determinate	Cherry	Small
NX34	NT-75	Fushi Qiang	China	S. lycopersicum	Indeterminate	Fresh market	Large
NX37	NT-81	Shenhong 4	Unknown	S. lycopersicum	Determinate	Fresh market	Medium
NX38#	NT-83yellow	Qianhuang 8Y	Unknown	S. lycopersicum ‘cerasiforme’	Semi-determinate	Cherry	Small
NX39	NT-83orange	Qianhuang 8O	Unknown	S. lycopersicum ‘cerasiforme’	Indeterminate	Cherry	Small
NX40	NT-84yellow-round	Xiaohong 10	Unknown	S. lycopersicum ‘cerasiforme’	Indeterminate	Cherry	Small
NX41	NT-85pear	NO.7	Unknown	S. lycopersicum ‘cerasiforme’	Indeterminate	Cherry	Small
NX42	NT-86-6orange-round	NO.10	Unknown	S. lycopersicum ‘cerasiforme’	Indeterminate	Cherry	Small
NX43	NT-88	NO.6	Unknown	S. lycopersicum ‘cerasiforme’	Semi-determinate	Cherry	Small
NX44#	NT-89	NO.5	Unknown	S. lycopersicum ‘cerasiforme’	Indeterminate	Cherry	Small
NX45	NT-90	NO.8	Unknown	S. lycopersicum ‘cerasiforme’	Indeterminate	Cherry	Small
NX46	NT-91	NO.9	Unknown	S. lycopersicum ‘cerasiforme’	Indeterminate	Cherry	Small
NX47	NT-94	AlsaGma	Unknown	S. lycopersicum ‘cerasiforme’	Semi-determinate	Cherry	Small
NX48	NT-165	LA0490	TGRC	S. lycopersicum	Determinate	Fresh market	Medium
NX49	NT-172	LA1274	Peru	S. corneliomulleri	Indeterminate	Wild	Small~§
NX50	NT-173	LA1500	TGRC	S. lycopersicum ‘cerasiforme’	Semi-determinate	Cherry	Small
NX51	NT-174	LA1563	TGRC	S. lycopersicum	Determinate	Fresh market	Medium
NX52	NT-175	LA1598	Peru	S. pimpinellifolium	Indeterminate	Wild	Small~§
NX53#	NT-177	LA1698	Peru	S. lycopersicum	Indeterminate	Landrace	Small
NX54	NT-181	LA1994	Mexico	S. lycopersicum	Semi-determinate	Landrace	Small~§
NX55	NT-182	LA1996	TGRC	S. lycopersicum	Determinate	Heirloom	Medium
NX56	NT-183	LA2006	TGRC	S. lycopersicum	Determinate	Fresh market	Medium
NX57	NT-185	LA2019	TGRC	S. lycopersicum	Determinate	Fresh market	Medium
NX58	NT-186	LA2093	Ecuador	S. pimpinellifolium	Indeterminate	Wild	Small~§
NX59	NT-187	LA2408	Unknown	S. lycopersicum ‘cerasiforme’	Semi-determinate	Cherry	Small
NX60	NT-188	LA2413	TGRC	S. lycopersicum ‘cerasiforme’	Semi-determinate	Cherry	Small
NX61	NT-189	LA2661	TGRC	S. lycopersicum ‘cerasiforme’	Semi-determinate	Cherry	Small
NX62	NT-191	LA2683	Peru	S. lycopersicum	Indeterminate	Landrace	Small
NX63	NT-192	LA2706	TGRC	S. lycopersicum	Indeterminate	Fresh market	Medium
NX64	NT-193	LA2748	TGRC	S. lycopersicum	Indeterminate	Fresh market	Medium
NX66	NT-195	LA3006	TGRC	S. lycopersicum	Semi-determinate	Heirloom	Small
NX68	NT-200	LA3475	TGRC	S. lycopersicum	Determinate	Fresh market	Medium
NX69	NT-201	LA3538	TGRC	S. lycopersicum ‘cerasiforme’	Semi-determinate	Cherry	Small
NX70	NT-202	LA3668	TGRC	S. lycopersicum	Indeterminate	Fresh market	Medium
NX71	NT-203	LA3847	TGRC	S. lycopersicum	Determinate	Fresh market	Large
NX72	NT-206	LA3917	TGRC	S. lycopersicum	Determinate	Processing	Small
NX73	NT-211	LA4355	TGRC	S. lycopersicum ‘cerasiforme’	Determinate	Cherry	Small
NX74	NT-212	LA4440	TGRC	S. lycopersicum	Indeterminate	Fresh market	Medium
NX78	NT-236	Huangluomanri	China	S. lycopersicum ‘cerasiforme’	Semi-determinate	Cherry	Small
NX80	NT-238	Huangdibao	China	S. lycopersicum ‘cerasiforme’	Semi-determinate	Cherry	Small
NX81	NT-240	Bush Glacier	USA	S. lycopersicum	Indeterminate	Landrace	Medium
NX82	NT-242	Pole Pineapple	USA	S. lycopersicum	Indeterminate	Heirloom	Large
NX83	NT-243	Cherry Lizzano	USA	S. lycopersicum ‘cerasiforme’	Semi-determinate	Cherry	Small
NX86	NT-248	Pole/Cherry Sweetie	USA	S. lycopersicum ‘cerasiforme’	Indeterminate	Cherry	Small
NX87	NT-250Y	Cherry Pear Blean Yellow	USA	S. lycopersicum	Indeterminate	Landrace	Small
NX88	NT-250R	Cherry Pear Blean Red	USA	S. lycopersicum	Indeterminate	Landrace	Small
NX89	NT-251R	Grape Jelly Bean Red	USA	S. lycopersicum ‘cerasiforme’	Indeterminate	Cherry	Small
NX90	NT-252	Wild-Amirican	USA	S. lycopersicum ‘cerasiforme’	Indeterminate	Cherry	Small
NX91	NT-433	LA0214	TGRC	S. lycopersicum	Indeterminate	Fresh market	Large
NX94	NT-436	LA1022	TGRC	S. lycopersicum	Semi-determinate	Fresh market	Large
NX95	NT-438	LA1502	TGRC	S. lycopersicum	Determinate	Fresh market	Medium
NX96	NT-439	LA1589	El Salvador	S. pimpinellifolium	Indeterminate	Wild	Small~§
NX100	NT-444	LA2820	TGRC	S. lycopersicum	Indeterminate	Fresh market	Medium
NX101	NT-445	LA2826	TGRC	S. lycopersicum	Indeterminate	Fresh market	Large
NX102	NT-447	LA4459	TGRC	S. lycopersicum	Indeterminate	Landrace	Small
NX103	NT-448	LA4488	TGRC	S. pennellii	Indeterminate	Wild	Small~§
NX105	NT-451	3-082	TGRC	S. lycopersicum	Determinate	Fresh market	Large
NX106	NT-453	LA0810	TGRC	S. lycopersicum	Determinate	Fresh market	Large
NX108	NT-455	LA1533	TGRC	S. lycopersicum	Determinate	Heirloom	Small
NX110	NT-7	Bush Italian Roma	USA	S. lycopersicum	Determinate	Heirloom	Small
NX112	NT-13	Mexican Husk	USA	S. lycopersicum	Indeterminate	Fresh market	Large
NX113	NT-18-4-4Y	Pole cherokee Purple Y	USA	S. lycopersicum ‘cerasiforme’	Indeterminate	Cherry	Small
NX114	NT-18-4-4R	Pole cherokee Purple R	USA	S. lycopersicum ‘cerasiforme’	Indeterminate	Cherry	Small
NX115#	NT-19	Pole Red Siberian	USA	S. lycopersicum	Determinate	Fresh market	Medium
NX116#	NT-31	Sugar Sweetie	USA	S. lycopersicum ‘cerasiforme’	Indeterminate	Cherry	Small
NX117#	NT-32	Gardener's Delight	USA	S. lycopersicum	Indeterminate	Heirloom	Small
NX118	NT-34	Sun Gold	USA	S. lycopersicum ‘cerasiforme’	Indeterminate	Cherry	Small
NX119	NT-36	Stupice	USA	S. lycopersicum ‘cerasiforme’	Indeterminate	Cherry	Small
NX120	NT-37	Big Purple	Canada	S. lycopersicum	Indeterminate	Fresh market	Large
NX121	NT-47	Fushi NO.3	Holland	S. lycopersicum ‘cerasiforme’	Indeterminate	Cherry	Small
NX122#	NT-51	Cairo	Holland	S. lycopersicum	Indeterminate	Fresh market	Medium
NX123#	NT-52	Romana	Holland	S. lycopersicum	Indeterminate	Fresh market	Medium
NX124	NT-54	Yana	Holland	S. lycopersicum ‘cerasiforme’	Indeterminate	Cherry	Small
NX125	NT-70	C Gardener's Delight	USA	S. lycopersicum ‘cerasiforme’	Indeterminate	Cherry	Small
NX126	NT-72	Dwarf Ornamental Tomato	China	S. lycopersicum ‘cerasiforme’	Determinate	Cherry	Small
NX127	NT-79	Small Yellow	Unknown	S. lycopersicum ‘cerasiforme’	Indeterminate	Cherry	Small
NX128	NT-80	Big Red	Unknown	S. lycopersicum	Indeterminate	Fresh market	Large
NX129	NT-82	Small Deep Yellow	Unknown	S. lycopersicum	Determinate	Fresh market	Large
NX131	NT-168	LA1019	TGRC	S. lycopersicum ‘cerasiforme’	Determinate	Cherry	Small
NX132	NT-169	LA1023	TGRC	S. lycopersicum	Determinate	Heirloom	Medium
NX133	NT-171	LA1223	TGRC	S. lycopersicum ‘cerasiforme’	Semi-determinate	Cherry	Small
NX134	NT-176	LA1627	TGRC	S. lycopersicum ‘cerasiforme’	Determinate	Cherry	Small
NX136	NT-179	LA1926	TGRC	S. lycopersicum ‘cerasiforme’	Indeterminate	Cherry	Small
NX137	NT-190	LA2662	TGRC	S. lycopersicum	Determinate	Fresh market	Medium
NX138	NT-196	LA3120	TGRC	S. lycopersicum ‘cerasiforme’	Determinate	Cherry	Small
NX139	NT-197	LA3183	TGRC	S. lycopersicum	Determinate	Fresh market	Medium
NX141	NT-204	LA3915	TGRC	S. lycopersicum	Determinate	Processing	Medium
NX142	NT-207	LA3918	TGRC	S. lycopersicum	Determinate	Processing	Medium
NX144	NT-209	LA3920	TGRC	S. lycopersicum	Determinate	Processing	Medium
NX145	NT-210	LA3932	TGRC	S. lycopersicum	Determinate	Processing	Medium
NX146	NT-213	LA0063	TGRC	S. lycopersicum	Indeterminate	Fresh market	Large
NX147	NT-226	Yanuo	China	S. lycopersicum ‘cerasiforme’	Indeterminate	Cherry	Small
NX148	NT-227	Othniel	China	S. lycopersicum ‘cerasiforme’	Indeterminate	Cherry	Small
NX149	NT-235	Oumeifenguan	China	S. lycopersicum ‘cerasiforme’	Semi-determinate	Cherry	Small
NX150#	NT-241	Pole Principe Borghese	USA	S. lycopersicum ‘cerasiforme’	Indeterminate	Cherry	Small
NX153	NT-285	Ailsa Craig	USA	S. lycopersicum ‘cerasiforme’	Indeterminate	Cherry	Small
NX154	NT-452	2-493	TGRC	S. lycopersicum	Determinate	Fresh market	Medium
NX155*	NT-580	TB0010	China	S. lycopersicum	Indeterminate	Heirloom	Medium
NX156#	NT-581	TB0016	China	S. lycopersicum	Indeterminate	Fresh market	Medium
NX157#	NT-582	TB0028	China	S. lycopersicum ‘cerasiforme’	Indeterminate	Cherry	Small
NX158*	NT-583	TB0038	China	S. lycopersicum ‘cerasiforme’	Indeterminate	Cherry	Small
NX159*	NT-584	TB0043	China	S. lycopersicum	Indeterminate	Heirloom	Medium
NX160#	NT-585	TB0048	China	S. lycopersicum ‘cerasiforme’	Indeterminate	Cherry	Small
NX161#	NT-586	TB0062	China	S. lycopersicum ‘cerasiforme’	Determinate	Cherry	Small
NX162#	NT-587	TB0268	China	S. lycopersicum	Indeterminate	Fresh market	Medium
NX163#	NT-588	TB0273	China	S. lycopersicum ‘cerasiforme’	Determinate	Cherry	Small
NX164*	NT-589	TB0302	China	S. lycopersicum ‘cerasiforme’	Indeterminate	Cherry	Small
NX165#	NT-590	TB0365	China	S. lycopersicum	Indeterminate	Landrace	Small
NX166#	NT-591	TB0386	China	S. lycopersicum ‘cerasiforme’	Indeterminate	Cherry	Small
NX167*	NT-592	TB0601	China	S. lycopersicum ‘cerasiforme’	Indeterminate	Cherry	Small
NX168	NT-594	LA2711	Egypt	S. lycopersicum	Indeterminate	Heirloom	Medium
NX169	NT-595	LA3008	Italy	S. lycopersicum	Indeterminate	Fresh market	Medium
NX171	NT-597	Pime-Bruce	Unknown	S. lycopersicum ‘cerasiforme’	Indeterminate	Cherry	Small
NX172	NT-598	TS-16	Ecuador	S. lycopersicum var. cerasiforme	Indeterminate	Wild	Small~§
NX173	NT-599	TS-21	Unknown	S. lycopersicum	Indeterminate	Fresh market	Medium
NX174	NT-600	TS-22	Unknown	S. lycopersicum	Indeterminate	Fresh market	Large
NX175	NT-601	TS-24	Unknown	S. lycopersicum	Determinate	Fresh market	Medium
NX176	NT-602	LA1204	Guatemala	S. lycopersicum	Indeterminate	Landrace	Small
NX177	NT-603	LA2137	Ecuador	S. lycopersicum	Indeterminate	Landrace	Small
NX178	NT-604	TS-42	Unknown	S. lycopersicum ‘cerasiforme’	Indeterminate	Cherry	Small
NX179	NT-605	A Pera Abruzzese	Italy	S. lycopersicum	Indeterminate	Landrace	Small
NX180	NT-606	TS-45	USA	S. lycopersicum ‘cerasiforme’	Indeterminate	Cherry	Small
NX181	NT-607	TS-47	Russia	S. lycopersicum	Indeterminate	Landrace	Small
NX182	NT-608	TS-43	Unknown	S. lycopersicum	Indeterminate	Landrace	Small
NX184	NT-610	LA2095	Ecuador	S. lycopersicum	Determinate	Landrace	Small
NX185	NT-611	LA1307	TGRC	S. lycopersicum	Indeterminate	Heirloom	Small
NX186	NT-612	TS-58	Unknown	S. lycopersicum	Indeterminate	Landrace	Small
NX187	NT-613	LA2009	USA	S. lycopersicum ‘cerasiforme’	Determinate	Cherry	Small
NX188	NT-614	LA2670	Peru	S. lycopersicum	Determinate	Landrace	Small
NX189	NT-615	EA03525	Russia	S. lycopersicum ‘cerasiforme’	Indeterminate	Cherry	Small
NX190	NT-616	LA1482	TGRC	S. lycopersicum	Indeterminate	Fresh market	Large
NX191	NT-617	LA0395	TGRC	S. lycopersicum ‘cerasiforme’	Indeterminate	Cherry	Small
NX192	NT-618	LA1459	TGRC	S. lycopersicum ‘cerasiforme’	Indeterminate	Cherry	Small
NX193	NT-619	Atacames	Unknown	S. lycopersicum	Determinate	Fresh market	Large
NX194	NT-620	EA02895	Russia	S. lycopersicum	Indeterminate	Fresh market	Large
NX195	NT-621	EA01804	Italy	S. lycopersicum	Determinate	Fresh market	Medium
NX196	NT-622	TS-90	Russia	S. lycopersicum ‘cerasiforme’	Determinate	Cherry	Small
NX197	NT-623	Enano	Argentina	S. lycopersicum	Determinate	Fresh market	Medium
NX198	NT-624	LA1456	TGRC	S. lycopersicum	Determinate	Fresh market	Medium
NX199	NT-625	LA0154	France	S. lycopersicum ‘cerasiforme’	Indeterminate	Cherry	Small
NX200	NT-626	TS-100	Unknown	S. lycopersicum	Indeterminate	Landrace	Small
NX201	NT-627	EA03673	Russia	S. lycopersicum	Indeterminate	Fresh market	Large
NX202	NT-628	TS-104	Italy	S. lycopersicum ‘cerasiforme’	Determinate	Cherry	Small
NX204	NT-630	Turrialba	Costa Rica	S. lycopersicum	Determinate	Fresh market	Large
NX205	NT-631	Puno I	Peru	S. lycopersicum	Indeterminate	Fresh market	Large
NX206	NT-632	TS-112	Russia	S. lycopersicum	Indeterminate	Fresh market	Medium
NX207	NT-633	Wva 106	Unknown	S. lycopersicum	Determinate	Fresh market	Medium
NX209	NT-635	LA0012	TGRC	S. lycopersicum	Indeterminate	Fresh market	Medium
NX211	NT-637	LA3903	France	S. lycopersicum	Indeterminate	Fresh market	Large
NX212	NT-638	LA3528	TGRC	S. lycopersicum	Indeterminate	Fresh market	Medium
NX213	NT-639	Florida 7547	USA	S. lycopersicum	Indeterminate	Landrace	Small~§
NX214	NT-640	LA1425	Colombia	S. lycopersicum	Indeterminate	Landrace	Small
NX215	NT-641	Tarapoto	Unknown	S. lycopersicum ‘cerasiforme’	Indeterminate	Cherry	Small
NX216	NT-642	LA1021	Brazil	S. lycopersicum	Indeterminate	Landrace	Medium
NX217	NT-643	Muna	Unknown	S. lycopersicum	Indeterminate	Heirloom	Large
NX218	NT-644	LA0533	Germany	S. lycopersicum	Determinate	Fresh market	Large
NX220	NT-646	TS-160	Russia	S. lycopersicum	Determinate	Fresh market	Medium
NX221	NT-647	TS-161	Unknown	S. lycopersicum ‘cerasiforme’	Indeterminate	Cherry	Small
NX222	NT-648	TS-162	Unknown	S. lycopersicum ‘cerasiforme’	Indeterminate	Cherry	Small~§
NX223	NT-649	LA1504	France	S. lycopersicum	Indeterminate	Fresh market	Large
NX224	NT-650	LA1218	Mexico	S. lycopersicum	Determinate	Landrace	Small
NX225	NT-651	Piura	Unknown	S. lycopersicum ‘cerasiforme’	Determinate	Cherry	Small
NX226	NT-652	LA0147	Honduras	S. lycopersicum	Determinate	Landrace	Medium
NX227	NT-653	Da Appendere	Italy	S. lycopersicum	Indeterminate	Landrace	Small~§
NX228	NT-654	UC-82	USA	S. lycopersicum ‘cerasiforme’	Indeterminate	Cherry	Small
NX229	NT-655	TS-172	Canada	S. lycopersicum ‘cerasiforme’	Indeterminate	Cherry	Small
NX230	NT-656	TS-175	Russia	S. lycopersicum	Indeterminate	Landrace	Small
NX231	NT-657	TS-178	Spain	S. lycopersicum	Indeterminate	Fresh market	Large
NX232	NT-658	LA1457	TGRC	S. lycopersicum	Semi-determinate	Fresh market	Large
NX234	NT-660	LA1506	TGRC	S. lycopersicum ‘cerasiforme’	Indeterminate	Cherry	Small
NX236	NT-662	Ace	USA	S. lycopersicum ‘cerasiforme’	Indeterminate	Cherry	Small
NX238	NT-664	Da serbo	Unknown	S. lycopersicum	Determinate	Fresh market	Large
NX239*	NT-665	LA4354	TGRC	S. lycopersicum	Determinate	Fresh market	Medium
NX240#	NT-666	Panama	Panama	S. lycopersicum	Indeterminate	Landrace	Medium
NX241#	NT-667	Mobalcon	Unknown	S. lycopersicum	Determinate	Fresh market	Large
NX242	NT-668	Jalapa	Unknown	S. lycopersicum	Determinate	Fresh market	Medium
NX243	NT-669	Wva 700	Unknown	S. lycopersicum	Indeterminate	Fresh market	Medium
NX245#	NT-671	TS-225	Unknown	S. lycopersicum ‘cerasiforme’	Indeterminate	Cherry	Small~§
NX246*	NT-672	Atom	Unknown	S. lycopersicum ‘cerasiforme’	Indeterminate	Cherry	Small
NX247#	NT-673	Clémentine	Unknown	S. lycopersicum ‘cerasiforme’	Determinate	Cherry	Small
NX248#	NT-674	TS-26	Unknown	S. lycopersicum	Determinate	Fresh market	Medium
NX249	NT-675	TS-36	Guatemala	S. lycopersicum	Indeterminate	Landrace	Small
NX250	NT-676	Cerise Gold	Unknown	S. lycopersicum ‘cerasiforme’	Determinate	Cherry	Small
NX251	NT-677	Cerise Rose	Unknown	S. lycopersicum ‘cerasiforme’	Indeterminate	Cherry	Small
NX252	NT-678	TS-62	Argentina	S. lycopersicum	Indeterminate	Landrace	Small
NX253#	NT-679	Ohmiya Sun Cerise	Unknown	S. lycopersicum	Indeterminate	Landrace	Small
NX254#	NT-680	Poire Jaune	Unknown	S. lycopersicum	Indeterminate	Fresh market	Large
NX255#	NT-681	TS-83	ZAIRE	S. lycopersicum	Determinate	Fresh market	Medium
NX256#	NT-682	LA4355	USA	S. lycopersicum ‘cerasiforme’	Indeterminate	Cherry	Small
NX257*	NT-683	Celsior	Unknown	S. lycopersicum ‘cerasiforme’	Indeterminate	Cherry	Small
NX258#	NT-684	Malintka 101	Italy	S. lycopersicum	Indeterminate	Heirloom	Medium
NX259	NT-685	149-77	Italy	S. lycopersicum	Determinate	Fresh market	Medium
NX260#	NT-686	Green Doctors	USA	S. lycopersicum	Indeterminate	Landrace	Small
NX261	NT-687	Green Moldovan	USA	S. lycopersicum	Indeterminate	Landrace	Large
NX262	NT-688	Black Gaint	USA	S. lycopersicum	Indeterminate	Landrace	Small
NX263	NT-689	Carbon	USA	S. lycopersicum	Indeterminate	Landrace	Large
NX264	NT-690	Violet Jaspoer	USA	S. lycopersicum	Indeterminate	Landrace	Small
NX266	NT-692	Big White Pink	USA	S. lycopersicum ‘cerasiforme’	Indeterminate	Cherry	Small
NX268	NT-694	Processing Yellow Tomato	China	S. lycopersicum	Determinate	Processing	Small
NX269	NT-695	QK-1	China	S. lycopersicum	Determinate	Processing	Small
NX271	NT-697	QK-3	China	S. lycopersicum	Determinate	Processing	Medium
NX272	NT-698	QK-4	China	S. lycopersicum	Determinate	Processing	Medium
NX274	NT-700	QK-6	China	S. lycopersicum	Determinate	Processing	Medium
NX276	NT-702	QK-8	China	S. lycopersicum	Determinate	Processing	Medium
NX277	NT-703	QK-9	China	S. lycopersicum	Determinate	Processing	Small
NX278	NT-704	QK-10	China	S. lycopersicum	Determinate	Processing	Small
NX279	NT-705	QK-11	China	S. lycopersicum	Determinate	Processing	Small
NX281	NT-707	QK-13	China	S. lycopersicum	Determinate	Processing	Medium
NX282	NT-708	QK-14	China	S. lycopersicum ‘cerasiforme’	Indeterminate	Cherry	Small
NX285	NT-711	QK-19	China	S. lycopersicum	Determinate	Processing	Medium
NX287	NT-713	QK-23	China	S. lycopersicum	Determinate	Processing	Medium
NX288	NT-714	PX-1	China	S. lycopersicum	Determinate	Processing	Medium
NX289	NT-715	PX-2	China	S. lycopersicum	Determinate	Processing	Medium
NX291	NT-717	PX-7	China	S. lycopersicum	Determinate	Processing	Medium
NX292	NT-718	87-5	China	S. lycopersicum	Determinate	Processing	Medium
NX293	NT-719	KT-1	China	S. lycopersicum	Determinate	Processing	Medium
NX294	NT-720	KT-7	China	S. lycopersicum	Determinate	Processing	Medium
NX295	NT-721	KT-15	China	S. lycopersicum	Determinate	Processing	Medium
NX296	NT-722	KT-17	China	S. lycopersicum	Determinate	Processing	Medium
NX297	NT-723	KT-19	China	S. lycopersicum	Determinate	Processing	Medium
NX298#	NT-724	KT-1	China	S. lycopersicum	Determinate	Processing	Small
NX299#	NT-725	KT-7	China	S. lycopersicum	Determinate	Processing	Medium
NX300#	NT-726	KT-9	China	S. lycopersicum	Determinate	Processing	Small
Note:
#These germplasms were randomly sampled from the initial population to establish a new population
* These accessions, different from the genotypes in the initial germplasm population, were additional, newly introduced germplasm samples
Tomato Genetics Resource Center (TGRC)
† Explanation for fruit classification as below
Standard	Fruit weight (g)
Small	<50 (Small~§ <5)
Medium	[50, 100]
Big	>100

## Sheet: Table S2
Table S2. Salt damage levels in tomato seedlings post salt treatment
Grade	Grading standard
0	Normal green plants with no visible damage.
1	Slight discoloration or darkening observed on leaves, with slight reduced growth.
2	Minor leaf yellowing or loss, with slight reduced growth.
3	Significant fading of all green foliage, with significantly stunted growth
4	Complete leaf yellowing; growth of the plant has ceased.
5	Plant death characterized by desiccation or complete dryness.

## Sheet: Table S3
Table S3. Results of ANOVA tests for eight evaluative indicators
Trait	Cluster		Error		F	Sig.
	Mean square	df	Mean square	df
PHR	0.248	4	0.004	236	57.56	0
FFR	0.548	4	0.004	236	126.007	0
SFR	0.498	4	0.005	236	96.489	0
RFR	1.122	4	0.011	236	100.243	0
FDR	1.111	4	0.005	236	226.433	0
SDR	1.008	4	0.006	236	172.364	0
RDR	1.951	4	0.011	236	185.816	0
IS	0.28	4	0.023	236	12.249	0
Note: PHR: relative plant height; FFR: relative full fresh weight; SFR: relative shoot fresh weight; RFR: relative root fresh weight; FDR: relative full dry weight; SDR: relative shoot dry weight; RDR: relative root dry weight; IS: index of salinity damage.

## Sheet: Table S4
Table S4. Comprehensive scores of 241 tomato germplasm accessions using two different weighting methods
NX	CS1	CS2	NX	CS1	CS2	NX	CS1	CS2	NX	CS1	CS2	NX	CS1	CS2
1	0.46	0.91	58	0.74	4.35	124	0.3	-1.08	186	0.24	-1.6	243	0.41	0.41
3	0.3	-0.89	59	0.14	-2.82	125	0.34	-0.52	187	0.55	2.12	245	0.29	-1.3
7	0.36	-0.23	60	0.58	2.36	126	0.5	1.19	188	0.18	-2.53	247	0.41	0.21
9	0.29	-1.36	61	0.55	1.97	127	0.28	-1.22	189	0.34	-0.34	248	0.41	0.46
10	0.44	0.76	62	0.32	-1	128	0.35	-0.43	190	0.34	-0.62	249	0.24	-1.91
11	0.87	5.61	63	0.24	-1.65	129	0.21	-2.14	191	0.27	-1.36	250	0.33	-0.8
12	0.37	-0.19	64	0.21	-2.15	131	0.31	-1.12	192	0.67	3.55	251	0.32	-0.84
13	0.27	-1.36	66	0.42	0.3	132	0.67	3.43	193	0.27	-1.56	252	0.29	-1.1
14	0.27	-1.35	68	0.25	-1.56	133	0.67	3.36	194	0.29	-1.22	253	0.76	4.55
15	0.27	-1.26	69	0.57	2.41	134	0.42	0.47	195	0.31	-0.96	254	0.43	0.58
16	0.17	-2.52	70	0.82	5.58	136	0.31	-0.94	196	0.3	-1.07	255	0.47	1.01
17	0.32	-0.64	71	0.19	-2.65	137	0.19	-2.12	197	0.36	-0.54	256	0.39	-0.09
18	0.53	2.07	72	0.31	-0.95	138	0.28	-1.52	198	0.28	-1.19	258	0.64	3.07
19	0.3	-1.41	73	0.4	0.25	139	0.29	-1.21	199	0.2	-2.24	259	0.28	-1.15
20	0.6	2.28	74	0.36	-0.23	141	0.53	1.88	200	0.37	-0.18	260	0.3	-1.12
21	0.4	0.19	78	0.28	-1.09	142	0.22	-1.91	201	0.32	-0.69	261	0.41	0.94
22	0.71	4.34	80	0.55	2.38	144	0.34	-0.45	202	0.43	0.72	262	0.86	6.12
23	0.48	1.21	81	0.24	-1.88	145	0.52	1.59	204	0.39	0.14	263	0.41	0.21
24	0.54	2.01	82	0.26	-1.56	146	0.5	1.72	205	0.28	-1.41	264	0.38	0.17
25	0.12	-3.19	83	0.65	3.36	147	0.43	0.52	206	0.26	-1.49	266	0.18	-2.59
26	0.29	-1.38	86	0.53	1.88	148	0.39	0.1	207	0.4	0.32	268	0.33	-0.56
27	0.48	1.18	87	0.33	-0.67	149	0.38	-0.18	209	0.38	0.38	269	0.32	-0.82
28	0.53	1.57	88	0.32	-0.83	150	0.68	4.08	211	0.76	4.44	271	0.26	-1.54
29	0.42	0.61	89	0.52	1.84	153	0.44	0.6	212	0.11	-3.29	272	0.27	-1.11
30	0.45	0.81	90	0.46	0.94	154	0.37	-0.23	213	0.17	-2.67	274	0.3	-0.94
32	0.37	-0.22	91	0.37	-0.25	156	0.51	1.49	214	0.39	-0.24	276	0.2	-2.18
33	0.49	0.96	94	0.36	-0.12	157	0.35	-0.59	215	0.37	-0.43	277	0.18	-2.29
34	0.32	-0.95	95	0.37	-0.16	160	0.32	-0.98	216	0.29	-1.14	278	0.24	-1.63
37	0.32	-0.78	96	0.44	0.65	161	0.49	1.35	217	0.4	0.17	279	0.32	-0.85
38	0.27	-1.27	100	0.41	0.39	162	0.33	-0.59	218	0.38	0.24	281	0.14	-2.84
39	0.27	-1.51	101	0.36	-0.37	163	0.43	0.74	220	0.3	-1.04	282	0.27	-1.32
40	0.57	2.07	102	0.58	2.32	165	0.28	-1.06	221	0.19	-2.25	285	0.47	1.21
41	0.42	0.49	103	0.42	0.7	166	0.22	-1.88	222	0.35	-0.43	287	0.23	-1.63
42	0.4	0.2	105	0.68	3.82	168	0.2	-1.94	223	0.32	-0.71	288	0.23	-1.81
43	0.46	0.96	106	0.37	-0.19	169	0.51	1.65	224	0.5	1.39	289	0.66	3.61
44	0.37	-0.28	108	0.27	-1.31	171	0.23	-1.85	225	0.32	-0.81	291	0.51	1.72
45	0.26	-1.48	110	0.67	3.3	172	0.32	-1.02	226	0.55	1.9	292	0.51	1.8
46	0.2	-2.17	112	0.29	-1.21	173	0.37	-0.24	227	0.39	0.03	293	0.2	-2.1
47	0.44	0.45	113	0.29	-1.34	174	0.31	-0.86	228	0.41	-0.01	294	0.38	-0.26
48	0.22	-2.15	114	0.72	4.15	175	0.32	-0.73	229	0.3	-1.21	295	0.43	0.56
49	0.32	-0.5	115	0.39	0.19	176	0.63	3.14	230	0.4	-0.05	296	0.23	-1.79
50	0.44	0.59	116	0.46	0.67	177	0.32	-0.71	231	0.56	2.45	297	0.54	1.83
51	0.27	-1.32	117	0.59	2.15	178	0.54	1.65	232	0.34	-0.56	298	0.12	-3.05
52	0.94	6.36	118	0.8	5.19	179	0.12	-3.2	234	0.35	-0.06	299	0.39	0.06
53	0.21	-2.02	119	0.33	-0.83	180	0.38	-0.39	236	0.42	0.17	300	0.38	0.24
54	0.34	-0.17	120	0.51	1.71	181	0.27	-1.32	238	0.22	-1.84
55	0.39	0.09	121	0.41	0.02	182	0.23	-1.77	240	0.27	-1.31
56	0.54	2.17	122	0.35	-0.67	184	0.23	-1.68	241	0.3	-0.93
57	0.36	-0.21	123	0.39	0.01	185	0.24	-1.56	242	0.63	2.84
Note: NX: germplasm ID, CS: comprehensive score. CS1 and CS2 are calculated using weight method 1 and 2, respectively.

## Sheet: Table S5
Table S5. Stability assessment for the evaluation results of the optimized protocol
Evaluation method	Optimization	System variance (σs2)
Principal component analysis	Before optimization	0.0969
Principal component analysis	After optimization	0.0165

## Sheet: Table S6
Table S6. Results of ANOVA tests for ten evaluative indicators
Trait	Cluster		Error		F	Significance
	Mean square	df	Mean square	df
SFR	0.066	3	0.007	35	8.828	0
RFR	0.385	3	0.016	35	23.36	0
FFR	0.08	3	0.007	35	11.398	0
PHR	0.001	3	0.005	35	0.188	0.83
STDR	0.011	3	0.01	35	1.17	0.322
LNR	0.025	3	0.006	35	4.565	0.001
LLR	0.014	3	0.006	33	2.272	0.118
LWR	0.011	3	0.007	33	1.442	0.251
IS	0.621	3	0.013	35	47.368	0
Fv/Fm	0.569	3	0.012	35	48.309	0.009
Note: SFR: relative shoot fresh weight; RFR: relative root fresh weight; FFR: relative full fresh weight; PHR: relative plant height; STDR: relative stem diameter; LNR: relative leaf number; LLR: relative leaf length; LWR: relative leaf width; IS: index of salinity damage; Fv/Fm: maximum photochemical efficiency.

## Sheet: Table S7
Table S7. Component matrix
Trait	Initial principal component			Rotating principal component
	1	2	3	1	2	3
Eigenvalue	3.084	1.629	0.63	2.613	1.609	1.121
Contribution rate %	51.393	27.158	10.5	43.549	26.812	18.69
FFR	0.892	-0.421	-0.108	0.977	0.17	0.032
SFR	0.889	-0.305	-0.203	0.912	0.302	0.005
RFR	0.643	-0.59	0.227	0.854	-0.248	0.148
LNR	0.499	0.647	-0.438	0.062	0.92	0.098
Fv/Fm	0.587	0.522	0.578	0.256	0.7	0.507
IS (reversed)	0.701	0.566	0.015	0.164	0.302	0.912
Note: FFR: relative full fresh weight; SFR: relative shoot fresh weight; RFR: relative root fresh weight; LNR: relative leaf number; Fv/Fm: maximum photochemical efficiency; IS: index of salinity damage; IS (reversed): the values of inversion of the IS

## Sheet: Table S8
Table S8. KMO (Kaiser–Meyer–Olkin) measurement and Bartlett's test of sphericity
KMO value	Bartlett's tests of sphericity
	Approximate Chi-Square	df	Sig.
0.678	3794.07	28	0

## Sheet: Table S9
Table S9. Distribution of tomatoes with different genetic backgrounds across three growth habit groups
Growth habit type	Wild	Landrace	Cherry	Heirloom	Contemporary	Total
Determinate	0 (0.0%)	4 (4.6%)	18 (20.7%)	6 (6.9%)	59 (67.8%)	87 (100%)
Indeterminate	6	28	59	8	32	133
Semi-determinate	0 (0.0%)	1 (4.8%)	17 (80.9%)	1 (4.8%)	2 (9.5%)	21 (100%)
Total	6	33	94	15	93	241
